# Supplementary material
Source: PubMed Central journal article supplement (PMC9727003)
Supplement: 11524_2022_692_MOESM1_ESM.pdf [file 11524_2022_692_MOESM1_ESM.pdf]

**Supplement 1: ICD-9 and ICD-10 discharge diagnosis codes**

| <b>Condition</b>      | <b>ICD-9</b>                                                                                                                                                                                                                                                                                                                                        | <b>ICD-10</b>                                                                                               |
|-----------------------|-----------------------------------------------------------------------------------------------------------------------------------------------------------------------------------------------------------------------------------------------------------------------------------------------------------------------------------------------------|-------------------------------------------------------------------------------------------------------------|
| <b>Asthma</b>         | 493                                                                                                                                                                                                                                                                                                                                                 | J45                                                                                                         |
| <b>CVD</b>            |                                                                                                                                                                                                                                                                                                                                                     |                                                                                                             |
| Myocardial Infarction | 410, 412                                                                                                                                                                                                                                                                                                                                            | I21, I22, I25.2                                                                                             |
| Stroke                | 398.91, 402.01, 402.11, 402.91, 404.01, 404.03, 404.11, 404.13, 404.91, 404.93, 425.4, 425.5, 425.6, 425.7, 425.8, 425.9, 430, 431, 432.0, 432.1, 432.9, 433.01, 433.11, 433.21, 433.31, 433.81, 433.91, 434.01, 434.11, 434.91, 435, 436, 436.0, 436.00, 436.9, 436.90, 852.00-852.06, 852.09, 852.20-852.26, 852.29, 852.40-852.46, 852.49, 853.0 | I09.9, I11.0, I13.0, I13.2, I25.5, I42.0, I42.5, I42.6, I42.7, I42.8, I42.9, I60, I61, I62, I63, I64, P29.0 |
| CHF                   | 428                                                                                                                                                                                                                                                                                                                                                 | I43, I50                                                                                                    |
| <b>Depression</b>     | 296.2, 296.3, 296.5, 300.4, 309, 311                                                                                                                                                                                                                                                                                                                | F20.4, F31.3-5, F32, F34.1, F41.2, F43.2                                                                    |
| <b>Diabetes</b>       | 250                                                                                                                                                                                                                                                                                                                                                 | E10-E14                                                                                                     |
| <b>Hypertension</b>   | 401, 402, 403, 404, 405                                                                                                                                                                                                                                                                                                                             | I10, I11, I12, I13, I14, I15                                                                                |

## Supplement 2: Parametrization of difference in difference model

$$\begin{aligned}\text{Logit}(P[Y_{kiT} = 1]) &= \beta_{k0} + \beta_{k1} * I(T_i = 1) + \beta_{k2} * (G_i = 1) * I(T_i = 1) + \beta_{k3} * C_i \\ \text{Log}(Z_{kiT}) &= \beta_{k0} + \beta_{k1} * I(T_i = 1) + \beta_{k2} * (G_i = 1) * I(T_i = 1) + \beta_{k3} * C_i + \log(t)\end{aligned}$$

where

$Y_{kiT}$ : binary indicator for the  $k^{\text{th}}$  health outcome (CVD, diabetes, etc.) at time T

$Z_{iT}$ : count of outpatient encounters at time T

t: length of follow-up in calendar years at time T

$T_i$ : binary indicator for the time period (0: baseline or 1: follow-up)

$G_i$ : binary indicator for whether the individual is in a block group that gentrified

$C_{iT}$ : covariates at time T

$\beta_k$ : vector of regression coefficients for the  $k^{\text{th}}$  health outcome

Here,  $\beta_1$  represents the change in log odds (or, for outpatient visits, the log of expected rate) of having the outcome for individuals within a block group that did not gentrify;  $\beta_1 + \beta_2$  change in log odds/ log of expected rate of having the outcome for individuals within a block group that did gentrify; and  $\beta_2$  represents the difference in the change in log odds of having the outcome (or log of expected rate for outpatient visits) comparing individuals in a block group that did gentrify to individuals in a block group that did not gentrify, conditional on covariates.

**Supplement 3: Eligibility criteria and variables used to define gentrification**

|                    | Steinmetz-Wood*                                                                                                                                                                                                  | Ding                                                                                                                                                                         | Hirsch                                                                                                                                                                                                                                                                                                                                                                                                                                                                                                                                                                 |
|--------------------|------------------------------------------------------------------------------------------------------------------------------------------------------------------------------------------------------------------|------------------------------------------------------------------------------------------------------------------------------------------------------------------------------|------------------------------------------------------------------------------------------------------------------------------------------------------------------------------------------------------------------------------------------------------------------------------------------------------------------------------------------------------------------------------------------------------------------------------------------------------------------------------------------------------------------------------------------------------------------------|
| <b>Eligibility</b> | Negative z-score in baseline year relative to broader area average and SD in household income, rent price, percent with bachelor's degree and positive z-score in percent below poverty level                    | Median household income below the citywide median at baseline                                                                                                                | >50 people<br>Top quartile of household income                                                                                                                                                                                                                                                                                                                                                                                                                                                                                                                         |
| <b>Variables</b>   | Median household income<br>Proportion of population with bachelor's degree<br>Average rent<br><br>Proportion of population with low income<br>Proportion of population aged 30–44 (not used in final definition) | Median household income<br>Median gross rent<br>Median home value<br><br>Median increase in its share of college educated residents                                          | Percent with bachelor's degree<br>Median contract rent price<br>Median home value                                                                                                                                                                                                                                                                                                                                                                                                                                                                                      |
| <b>Gentrified</b>  | Difference between baseline and follow-up (1996–2006) z-scores was positive for all indicators except for proportion of low income, which needed to be negative. Binary variable created.                        | Above citywide median percentage increase in either median gross rent or median home value AND an above citywide median increase in its share of college-educated residents. | <u>Gentrification</u> : 50–100% in change in college-educated residents from baseline to follow-up<br>AND<br>(50–75% in change in median monthly contract rent between baseline and follow-up<br>Or<br>50–75% in change in median home value between baseline and follow-up)<br><u>Intense gentrification</u> : 50–100% in change in college-educated residents from baseline to follow-up<br>AND<br>(75–100% in change in median monthly contract rent between baseline and follow-up<br>Or<br>75–100% in change in median home value between baseline and follow-up) |

\* Definition used in the main analysis

**Supplement 4: Comparison of baseline characteristics of definitions used in sensitivity analysis**

|                                                            | <b>Ding</b>             |                   | <b>Hirsch</b>                                              |                       |                               |                   |
|------------------------------------------------------------|-------------------------|-------------------|------------------------------------------------------------|-----------------------|-------------------------------|-------------------|
|                                                            | <b>Did Not Gentrify</b> | <b>Gentrified</b> | <b>Did Not Gentrify</b>                                    | <b>Gentrification</b> | <b>Intense Gentrification</b> |                   |
|                                                            | <b>(N=16139)</b>        | <b>(N=2015)</b>   | <b>(N=23754)</b>                                           | <b>(N=5877)</b>       | <b>(N=6804)</b>               |                   |
| <b>Block groups</b>                                        | <b>42</b>               | <b>7</b>          | <b>58</b>                                                  | <b>13</b>             | <b>16</b>                     |                   |
| <b>Demographics</b>                                        |                         |                   | <b>Demographics</b>                                        |                       |                               |                   |
| <b>Female</b>                                              | 9029 (55.9%)            | 1047 (52.0%)      | <b>Female</b>                                              | 13450 (56.6%)         | 3387 (57.6%)                  | 3742 (55.0%)      |
| <b>Age (yrs) (Median, 25<sup>th</sup>–75<sup>th</sup>)</b> | 41.7, (28.2–54.5)       | 40.3, (28.0–52.1) | <b>Age (yrs) (Median, 25<sup>th</sup>–75<sup>th</sup>)</b> | 43.2, (29.5–55.7)     | 43.1, (29.8–55.5)             | 45.0, (31.9–57.4) |
| Percent 65+                                                | 1809 (11.2%)            | 134 (6.7%)        | Percent 65+                                                | 2788 (11.7%)          | 722 (12.3%)                   | 995 (14.6%)       |
| <b>Race</b>                                                |                         |                   | <b>Race</b>                                                |                       |                               |                   |
| Black                                                      | 11987 (74.3%)           | 1397 (69.3%)      | Black                                                      | 14557 (61.3%)         | 3835 (65.3%)                  | 2811 (41.3%)      |
| Other                                                      | 1373 (8.5%)             | 180 (8.9%)        | Other                                                      | 1975 (8.3%)           | 440 (7.5%)                    | 561 (8.2%)        |
| White                                                      | 2779 (17.2%)            | 438 (21.7%)       | White                                                      | 7222 (30.4%)          | 1602 (27.3%)                  | 3432 (50.4%)      |
| <b>Payor</b>                                               |                         |                   | <b>Payor</b>                                               |                       |                               |                   |
| Private                                                    | 5616 (42.5%)            | 635 (39.8%)       | Private                                                    | 10393 (52.9%)         | 2501 (51.1%)                  | 3244 (57.1%)      |
| Public                                                     | 5712 (43.2%)            | 704 (44.2%)       | Public                                                     | 7081 (36.0%)          | 1821 (37.2%)                  | 1933 (34.0%)      |
| Self-Pay                                                   | 1899 (14.4%)            | 255 (16.0%)       | Self-Pay                                                   | 2175 (11.1%)          | 569 (11.6%)                   | 505 (8.9%)        |
| <b>Variables to Define Gentrification</b>                  |                         |                   | <b>Variables to Define Gentrification</b>                  |                       |                               |                   |
| <b>Median Household Income (\$)</b>                        | 29967 (8380)            | 25734 (10906)     | <b>Median Household Income (\$)</b>                        | 42836 (16726)         | 36591 (12101)                 | 45775 (16459)     |
| <b>Percent Bachelor's Degree</b>                           | 20.5 (16.1)             | 18.8 (14.4)       | <b>Percent Bachelor's Degree</b>                           | 33.1 (23.0)           | 29.4 (16.2)                   | 41.2 (19.9)       |
| <b>Average Rent (\$)</b>                                   | 749 (155)               | 679 (231)         | <b>Median Home Value (\$)</b>                              | 832 (198)             | 832 (159)                     | 878 (238)         |
| <b>Median Home Value (\$)</b>                              | 120908 (69324)          | 124836 (31733)    | <b>Median Rent (\$)</b>                                    | 151929 (79320)        | 137071 (43751)                | 168880 (64918)    |

**Supplement 5a: Sensitivity of models to a gentrification definition with fewer criteria – Ding definition**

|                             |      |      |      |        |
|-----------------------------|------|------|------|--------|
| Intercept                   | 0    | 0    | 0    | <0.001 |
| Time                        | 1.85 | 1.74 | 1.97 | <0.001 |
| Gentrification              | 1.1  | 0.93 | 1.3  | 0.28   |
| <b>Diabetes</b>             |      |      |      |        |
| Intercept                   | 0.02 | 0.02 | 0.02 | <0.001 |
| Time                        | 1.55 | 1.50 | 1.60 | <0.001 |
| Gentrification              | 1.07 | 0.96 | 1.19 | 0.23   |
| <b>Hypertension</b>         |      |      |      |        |
| Intercept                   | 0.02 | 0.02 | 0.02 | <0.001 |
| Time                        | 1.59 | 1.53 | 1.66 | <0.001 |
| Gentrification              | 0.94 | 0.86 | 1.03 | 0.20   |
| <b>Obesity</b>              |      |      |      |        |
| Intercept                   | 0.07 | 0.06 | 0.08 | <0.001 |
| Time                        | 3.26 | 3.15 | 3.39 | <0.001 |
| Gentrification              | 0.94 | 0.86 | 1.03 | 0.20   |
| <b>Depression</b>           |      |      |      |        |
| Intercept                   | 0.04 | 0.03 | 0.04 | <0.001 |
| Time                        | 2.37 | 2.28 | 2.46 | <0.001 |
| Gentrification              | 1.10 | 0.99 | 1.23 | 0.07   |
| <b>Asthma</b>               |      |      |      |        |
| Intercept                   | 0.05 | 0.04 | 0.05 | <0.001 |
| Time                        | 1.94 | 1.87 | 2.02 | <0.001 |
| Gentrification              | 1.13 | 1.00 | 1.28 | 0.04   |
| <b>Emergency Department</b> |      |      |      |        |
| Intercept                   | 0.73 | 0.68 | 0.79 | <0.001 |
| Time                        | 2.03 | 1.95 | 2.11 | <0.001 |
| Gentrification              | 1.10 | 1.02 | 1.19 | 0.01   |
| <b>Inpatient</b>            |      |      |      |        |
| Intercept                   | 0.02 | 0.02 | 0.02 | <0.001 |
| Time                        | 1.20 | 1.13 | 1.28 | <0.001 |
| Gentrification              | 1.09 | 0.97 | 1.22 | 0.15   |
| <b>Outpatient</b>           |      |      |      |        |
| Intercept                   | 0.27 | 0.24 | 0.29 | <0.001 |
| Time                        | 1.14 | 1.11 | 1.17 | <0.001 |
| Gentrification              | 0.98 | 0.93 | 1.05 | 0.61   |

Models adjusted for age, race, ICE, sex, insurance status, and the individual-level clustering effect.

**Supplement 5b: Sensitivity of models to a 2 stage (i.e., less and more intense) gentrification definition – Hirsch definition**

| <b>CVD</b>                  | <b>Estimate</b> | <b>95% CI</b> |      | <b>p-value</b> |
|-----------------------------|-----------------|---------------|------|----------------|
| Intercept                   | 0               | 0             | 0    | <0.001         |
| Time                        | 1.88            | 1.80          | 1.97 | <0.001         |
| Gentrification              | 1.04            | 0.94          | 1.15 | 0.48           |
| Intense Gentrification      | 1.00            | 0.91          | 1.11 | 0.96           |
| <b>Diabetes</b>             |                 |               |      |                |
| Intercept                   | 0.02            | 0.02          | 0.02 | <0.001         |
| Time                        | 1.54            | 1.51          | 1.58 | <0.001         |
| Gentrification              | 0.97            | 0.91          | 1.04 | 0.35           |
| Intense Gentrification      | 0.90            | 0.84          | 0.96 | 0.002          |
| <b>Hypertension</b>         |                 |               |      |                |
| Intercept                   | 0.02            | 0.02          | 0.02 | <0.001         |
| Time                        | 1.52            | 1.48          | 1.57 | <0.001         |
| Gentrification              | 0.97            | 0.92          | 1.03 | 0.35           |
| Intense Gentrification      | 0.89            | 0.84          | 0.95 | <0.001         |
| <b>Obesity</b>              |                 |               |      |                |
| Intercept                   | 0.08            | 0.08          | 0.09 | <0.001         |
| Time                        | 3.05            | 2.97          | 3.13 | <0.001         |
| Gentrification              | 0.94            | 0.89          | 1.00 | 0.04           |
| Intense Gentrification      | 0.86            | 0.82          | 0.91 | <0.001         |
| <b>Depression</b>           |                 |               |      |                |
| Intercept                   | 0.04            | 0.04          | 0.04 | <0.001         |
| Time                        | 2.27            | 2.21          | 2.33 | <0.001         |
| Gentrification              | 1.02            | 0.96          | 1.09 | 0.54           |
| Intense Gentrification      | 1.06            | 1.00          | 1.14 | 0.06           |
| <b>Asthma</b>               |                 |               |      |                |
| Intercept                   | 0.05            | 0.04          | 0.05 | <0.001         |
| Time                        | 1.92            | 1.86          | 1.98 | <0.001         |
| Gentrification              | 1.00            | 0.93          | 1.08 | 0.95           |
| Intense Gentrification      | 0.97            | 0.89          | 1.05 | 0.40           |
| <b>Emergency Department</b> |                 |               |      |                |
| Intercept                   | 0.62            | 0.58          | 0.65 | <0.001         |
| Time                        | 1.90            | 1.84          | 1.96 | <0.001         |
| Gentrification              | 1.03            | 0.98          | 1.08 | 0.30           |
| Intense Gentrification      | 1.09            | 1.04          | 1.15 | <0.001         |
| <b>Inpatient</b>            |                 |               |      |                |
| Intercept                   | 0.02            | 0.01          | 0.02 | <0.001         |

|                        |      |      |      |        |
|------------------------|------|------|------|--------|
| Time                   | 1.18 | 1.12 | 1.23 | <0.001 |
| Gentrification         | 1.04 | 0.97 | 1.12 | 0.23   |
| Intense Gentrification | 1.02 | 0.95 | 1.09 | 0.64   |
| <b>Outpatient</b>      |      |      |      |        |
| Intercept              | 0.26 | 0.25 | 0.29 | <0.001 |
| Time                   | 1.10 | 1.08 | 1.12 | <0.001 |
| Gentrification         | 0.98 | 0.94 | 1.01 | 0.14   |
| Intense Gentrification | 0.98 | 0.95 | 1.02 | 0.30   |

Models adjusted for age, ICE, sex, insurance status, and the individual-level clustering effect.

## Supplement 6a: Association between gentrification and health and health care utilization stratified by age

|                     |               | <65 years old |          |          |         | >= 65 years old |          |          |         |       |
|---------------------|---------------|---------------|----------|----------|---------|-----------------|----------|----------|---------|-------|
| CVD                 |               | Estimate*     | Lower CL | Upper CL | p-value | Estimate        | Lower CL | Upper CL | p-value | p-int |
|                     | <b>Main</b>   | 0.92          | 0.73     | 1.14     | 0.43    | 0               | 0        | 0        | <0.001  | 0.53  |
|                     | <b>Ding</b>   | 1.16          | 0.96     | 1.41     | 0.13    | 0               | 0        | Inf      | 0.12    | 0.13  |
|                     | <b>Hirsch</b> |               |          |          |         |                 |          |          |         |       |
|                     | Less          | 1.04          | 0.91     | 1.19     | 0.54    | 1.02            | 0.89     | 1.18     | 0.74    | 0.18  |
|                     | More          | 1.13          | 0.99     | 1.29     | 0.07    | 0.86            | 0.75     | 0.99     | 0.04    | 0.72  |
| <b>Diabetes</b>     |               | Estimate      | Lower CL | Upper CL | p-value | Estimate        | Lower CL | Upper CL | p-value | p-int |
|                     | <b>Main</b>   | 0.96          | 0.85     | 1.09     | 0.56    | 1.08            | 0.84     | 1.39     | 0.55    | 0.23  |
|                     | <b>Ding</b>   | 1.04          | 0.92     | 1.16     | 0.54    | 0.96            | 0.75     | 1.23     | 0.73    | 0.85  |
|                     | <b>Hirsch</b> |               |          |          |         |                 |          |          |         |       |
|                     | Less          | 0.99          | 0.92     | 1.07     | 0.84    | 0.91            | 0.8      | 1.04     | 0.16    | 0.11  |
|                     | More          | 0.94          | 0.87     | 1.02     | 0.13    | 0.78            | 0.69     | 0.89     | <0.001  | 0.02  |
| <b>Hypertension</b> |               | Estimate      | Lower CL | Upper CL | p-value | Estimate        | Lower CL | Upper CL | p-value | p-int |
|                     | <b>Main</b>   | 0.95          | 0.85     | 1.07     | 0.41    | 0.85            | 0.59     | 1.23     | 0.39    | 0.44  |
|                     | <b>Ding</b>   | 0.93          | 0.84     | 1.02     | 0.13    | 0.78            | 0.56     | 1.08     | 0.14    | 0.28  |
|                     | <b>Hirsch</b> |               |          |          |         |                 |          |          |         |       |
|                     | Less          | 0.96          | 0.91     | 1.03     | 0.25    | 1.00            | 0.85     | 1.19     | 0.97    | 0.001 |
|                     | More          | 0.89          | 0.83     | 0.94     | <0.001  | 0.91            | 0.78     | 1.05     | 0.19    | 0.24  |
| <b>Obesity</b>      |               | Estimate      | Lower CL | Upper CL | p-value | Estimate        | Lower CL | Upper CL | p-value | p-int |
|                     | <b>Main</b>   | 0.87          | 0.78     | 0.97     | 0.01    | 0.93            | 0.73     | 1.19     | 0.58    | 0.99  |
|                     | <b>Ding</b>   | 0.90          | 0.82     | 0.99     | 0.04    | 0.90            | 0.7      | 1.15     | 0.40    | 0.84  |
|                     | <b>Hirsch</b> |               |          |          |         |                 |          |          |         |       |
|                     | Less          | 0.95          | 0.89     | 1.01     | 0.08    | 0.97            | 0.85     | 1.10     | 0.63    | 0.83  |
|                     | More          | 0.86          | 0.80     | 0.91     | <0.001  | 0.89            | 0.79     | 1.01     | 0.07    | 0.47  |
| <b>Depression</b>   |               | Estimate      | Lower CL | Upper CL | p-value | Estimate        | Lower CL | Upper CL | p-value | p-int |
|                     | <b>Main</b>   | 1.01          | 0.89     | 1.15     | 0.85    | 1               | 0.75     | 1.34     | 1.00    | 0.43  |



|                              |          |          |          |         |          |          |          |         |       |
|------------------------------|----------|----------|----------|---------|----------|----------|----------|---------|-------|
| <b>Ding</b>                  | 1.03     | 0.92     | 1.15     | 0.59    | 1.15     | 0.87     | 1.52     | 0.32    | 0.58  |
| <b>Hirsch</b>                |          |          |          |         |          |          |          |         |       |
| Less                         | 1.05     | 0.98     | 1.13     | 0.17    | 0.93     | 0.8      | 1.07     | 0.31    | 0.06  |
| More                         | 1.09     | 1.01     | 1.17     | 0.02    | 0.94     | 0.82     | 1.07     | 0.36    | 0.04  |
| <b>Asthma</b>                | Estimate | Lower CL | Upper CL | p-value | Estimate | Lower CL | Upper CL | p-value | p-int |
| <b>Main</b>                  | 1.08     | 0.93     | 1.25     | 0.32    | 0        | 0        | Inf      | 0.16    | 0.09  |
| <b>Ding</b>                  | 1.10     | 0.97     | 1.25     | 0.14    | 1.11     | 0.8      | 1.53     | 0.54    | 0.46  |
| <b>Hirsch</b>                |          |          |          |         |          |          |          |         |       |
| Less                         | 0.99     | 0.91     | 1.08     | 0.76    | 1.01     | 0.85     | 1.2      | 0.92    | 0.16  |
| More                         | 0.99     | 0.91     | 1.08     | 0.86    | 0.81     | 0.68     | 0.97     | 0.02    | 0.32  |
| <b>Emergency Department</b>  | Estimate | Lower CL | Upper CL | p-value | Estimate | Lower CL | Upper CL | p-value | p-int |
| <b>Main</b>                  | 1.07     | 0.98     | 1.17     | 0.14    | 1.27     | 1.01     | 1.59     | 0.04    | 0.51  |
| <b>Ding</b>                  | 1.07     | 0.98     | 1.16     | 0.12    | 1.23     | 0.98     | 1.55     | 0.08    | 0.30  |
| <b>Hirsch</b>                |          |          |          |         |          |          |          |         |       |
| Less                         | 1.03     | 0.98     | 1.09     | 0.24    | 1.01     | 0.90     | 1.13     | 0.86    | 0.58  |
| More                         | 1.10     | 1.04     | 1.16     | <0.001  | 0.99     | 0.89     | 1.11     | 0.90    | 0.14  |
| <b>Inpatient Department</b>  | Estimate | Lower CL | Upper CL | p-value | Estimate | Lower CL | Upper CL | p-value | p-int |
| <b>Main</b>                  | 1.04     | 0.91     | 1.20     | 0.53    | Inf      | 0        | Inf      | 0.06    | 0.94  |
| <b>Ding</b>                  | 1.04     | 0.91     | 1.17     | 0.59    | 0        | 0        | 0        | 0.05    | 0.87  |
| <b>Hirsch</b>                |          |          |          |         |          |          |          |         |       |
| Less                         | 1.04     | 0.95     | 1.13     | 0.41    | 1.06     | 0.93     | 1.20     | 0.37    | 0.33  |
| More                         | 1.01     | 0.93     | 1.11     | 0.78    | 0.99     | 0.87     | 1.11     | 0.82    | 0.40  |
| <b>Outpatient Department</b> | Estimate | Lower CL | Upper CL | p-value | Estimate | Lower CL | Upper CL | p-value | p-int |
| <b>Main</b>                  | 0.91     | 0.84     | 0.98     | 0.01    | 0.97     | 0.86     | 1.1      | 0.64    | 0.26  |
| <b>Ding</b>                  | 0.99     | 0.92     | 1.06     | 0.70    | 0.92     | 0.82     | 1.05     | 0.22    | 0.19  |
| <b>Hirsch</b>                |          |          |          |         |          |          |          |         |       |
| Less                         | 0.98     | 0.94     | 1.02     | 0.29    | 0.98     | 0.93     | 1.05     | 0.61    | 0.58  |
| More                         | 0.98     | 0.94     | 1.02     | 0.39    | 0.99     | 0.93     | 1.06     | 0.87    | 0.74  |

Models adjusted for age, ICE, sex, insurance status, and the individual-level clustering effect.

\* Estimate refers to effect of gentrification for distinct definitions of gentrification

## Supplement 6b: Association between gentrification and health and health care utilization stratified by sex

| CVD                 |               | Male     |          |          |         | Female   |          |          |                  | p-int       |
|---------------------|---------------|----------|----------|----------|---------|----------|----------|----------|------------------|-------------|
|                     |               | Estimate | Lower CL | Upper CL | p-value | Estimate | Lower CL | Upper CL | p-value          |             |
| <b>CVD</b>          | <b>Main</b>   | 0.92     | 0.69     | 1.23     | 0.57    | 0.93     | 0.74     | 1.17     | 0.55             | 0.94        |
|                     | <b>Ding</b>   | 1.10     | 0.85     | 1.43     | 0.47    | 1.10     | 0.88     | 1.37     | 0.40             | 0.90        |
|                     | <b>Hirsch</b> |          |          |          |         |          |          |          |                  |             |
|                     | Less          | 1.01     | 0.85     | 1.19     | 0.95    | 1.06     | 0.93     | 1.2      | 0.39             | 0.59        |
|                     | More          | 1.06     | 0.91     | 1.25     | 0.45    | 0.97     | 0.85     | 1.1      | 0.59             | 0.26        |
| <b>Diabetes</b>     |               | Estimate | Lower CL | Upper CL | p-value | Estimate | Lower CL | Upper CL | p-value          | p-int       |
|                     | <b>Main</b>   | 1.02     | 0.85     | 1.23     | 0.83    | 0.98     | 0.84     | 1.14     | 0.79             | 0.68        |
|                     | <b>Ding</b>   | 1.05     | 0.89     | 1.23     | 0.59    | 1.08     | 0.94     | 1.25     | 0.26             | 0.64        |
|                     | <b>Hirsch</b> |          |          |          |         |          |          |          |                  |             |
|                     | Less          | 0.87     | 0.78     | 0.98     | 0.02    | 1.03     | 0.95     | 1.12     | 0.47             | <b>0.01</b> |
| More                | 0.87          | 0.78     | 0.97     | 0.01     | 0.92    | 0.84     | 1.01     | 0.07     | 0.44             |             |
| <b>Hypertension</b> |               | Estimate | Lower CL | Upper CL | p-value | Estimate | Lower CL | Upper CL | p-value          | p-int       |
|                     | <b>Main</b>   | 0.90     | 0.77     | 1.05     | 0.17    | 1.02     | 0.88     | 1.19     | 0.75             | 0.06        |
|                     | <b>Ding</b>   | 0.92     | 0.81     | 1.05     | 0.22    | 0.96     | 0.84     | 1.09     | 0.53             | 0.92        |
|                     | <b>Hirsch</b> |          |          |          |         |          |          |          |                  |             |
|                     | Less          | 0.98     | 0.9      | 1.06     | 0.59    | 0.97     | 0.9      | 1.05     | 0.49             | 0.62        |
| More                | 0.91          | 0.84     | 0.99     | 0.03     | 0.88    | 0.81     | 0.95     | 0.001    | <b>0.002</b>     |             |
| <b>Obesity</b>      |               | Estimate | Lower CL | Upper CL | p-value | Estimate | Lower CL | Upper CL | p-value          | p-int       |
|                     | <b>Main</b>   | 0.82     | 0.7      | 0.95     | 0.01    | 0.95     | 0.83     | 1.08     | 0.42             | 0.09        |
|                     | <b>Ding</b>   | 0.96     | 0.84     | 1.09     | 0.51    | 0.93     | 0.82     | 1.05     | 0.23             | 0.55        |
|                     | <b>Hirsch</b> |          |          |          |         |          |          |          |                  |             |
|                     | Less          | 0.90     | 0.83     | 0.98     | 0.02    | 0.97     | 0.9      | 1.04     | 0.37             | <b>0.05</b> |
| More                | 0.89          | 0.82     | 0.97     | 0.01     | 0.84    | 0.78     | 0.91     | <0.001   | <b>&lt;0.001</b> |             |
| <b>Depression</b>   |               | Estimate | Lower CL | Upper CL | p-value | Estimate | Lower CL | Upper CL | p-value          | p-int       |
|                     | <b>Main</b>   | 0.93     | 0.76     | 1.15     | 0.51    | 1.12     | 0.96     | 1.3      | 0.14             | 0.13        |

|                              |      |          |          |          |         |          |          |          |         |             |
|------------------------------|------|----------|----------|----------|---------|----------|----------|----------|---------|-------------|
| <b>Ding Hirsch</b>           |      | 1.01     | 0.85     | 1.2      | 0.93    | 1.15     | 1.01     | 1.32     | 0.03    | 0.24        |
|                              | Less | 1.00     | 0.89     | 1.12     | 0.97    | 1.03     | 0.95     | 1.12     | 0.44    | 0.61        |
|                              | More | 1.09     | 0.97     | 1.21     | 0.13    | 1.05     | 0.97     | 1.14     | 0.23    | 0.30        |
| <b>Asthma</b>                |      | Estimate | Lower CL | Upper CL | p-value | Estimate | Lower CL | Upper CL | p-value | p-int       |
| <b>Main</b>                  |      | 1.07     | 0.84     | 1.35     | 0.58    | 1.02     | 0.86     | 1.22     | 0.8     | 0.80        |
| <b>Ding Hirsch</b>           |      | 1.10     | 0.90     | 1.35     | 0.36    | 1.16     | 0.99     | 1.35     | 0.06    | 0.83        |
|                              | Less | 0.91     | 0.79     | 1.05     | 0.20    | 1.05     | 0.96     | 1.16     | 0.30    | 0.07        |
|                              | More | 0.95     | 0.83     | 1.09     | 0.51    | 0.97     | 0.88     | 1.07     | 0.58    | 0.88        |
| <b>Emergency Department</b>  |      | Estimate | Lower CL | Upper CL | p-value | Estimate | Lower CL | Upper CL | p-value | p-int       |
| <b>Main</b>                  |      | 0.98     | 0.87     | 1.11     | 0.78    | 1.22     | 1.08     | 1.37     | 0.001   | <b>0.01</b> |
| <b>Ding Hirsch</b>           |      | 1.09     | 0.98     | 1.22     | 0.11    | 1.11     | 1.00     | 1.24     | 0.06    | 0.99        |
|                              | Less | 1.03     | 0.96     | 1.11     | 0.45    | 1.03     | 0.96     | 1.09     | 0.46    | 0.81        |
|                              | More | 1.10     | 1.02     | 1.18     | 0.01    | 1.09     | 1.02     | 1.16     | 0.01    | 0.82        |
| <b>Inpatient Department</b>  |      | Estimate | Lower CL | Upper CL | p-value | Estimate | Lower CL | Upper CL | p-value | p-int       |
| <b>Main</b>                  |      | 1.11     | 0.92     | 1.34     | 0.28    | 1.07     | 0.92     | 1.26     | 0.38    | 0.85        |
| <b>Ding Hirsch</b>           |      | 1.20     | 1.02     | 1.42     | 0.03    | 1.00     | 0.86     | 1.16     | 0.98    | 0.15        |
|                              | Less | 1.04     | 0.93     | 1.17     | 0.45    | 1.05     | 0.96     | 1.15     | 0.32    | 0.94        |
|                              | More | 0.98     | 0.87     | 1.09     | 0.68    | 1.05     | 0.95     | 1.15     | 0.36    | 0.72        |
| <b>Outpatient Department</b> |      | Estimate | Lower CL | Upper CL | p-value | Estimate | Lower CL | Upper CL | p-value | p-int       |
| <b>Main</b>                  |      | 0.97     | 0.86     | 1.10     | 0.66    | 0.91     | 0.85     | 0.99     | 0.03    | 0.63        |
| <b>Ding Hirsch</b>           |      | 0.99     | 0.89     | 1.10     | 0.87    | 0.98     | 0.91     | 1.06     | 0.64    | 0.87        |
|                              | Less | 0.97     | 0.92     | 1.03     | 0.35    | 0.98     | 0.94     | 1.02     | 0.26    | 0.76        |

---

|      |      |      |      |      |      |      |      |      |      |
|------|------|------|------|------|------|------|------|------|------|
| More | 0.95 | 0.90 | 1.00 | 0.06 | 1.00 | 0.96 | 1.05 | 0.99 | 0.78 |
|------|------|------|------|------|------|------|------|------|------|

Models adjusted for age, race, ICE, sex, insurance status, and the individual-level clustering effect.

\* Estimate refers to effect of gentrification for distinct definitions of gentrification

## Supplement 6c: Association between gentrification and health and health care utilization stratified by race

| CVD                 | Non-Black |          |          |          | Black   |          |          |          |         |        |
|---------------------|-----------|----------|----------|----------|---------|----------|----------|----------|---------|--------|
|                     |           | Estimate | Lower CL | Upper CL | p-value | Estimate | Lower CL | Upper CL | p-value | p-int  |
| <b>Main</b>         |           | 0.43     | 0.17     | 1.08     | 0.07    | 1.00     | 0.83     | 1.20     | 0.98    | 0.07   |
| <b>Ding</b>         |           | 0.90     | 0.61     | 1.32     | 0.58    | 1.16     | 0.96     | 1.40     | 0.12    | 0.12   |
| <b>Hirsch</b>       |           |          |          |          |         |          |          |          |         |        |
|                     | Less      | 1.00     | 0.83     | 1.20     | 1.00    | 1.07     | 0.94     | 1.20     | 0.30    | 0.56   |
|                     | More      | 0.92     | 0.80     | 1.07     | 0.30    | 1.10     | 0.96     | 1.27     | 0.17    | 0.05   |
| <b>Diabetes</b>     |           |          |          |          |         |          |          |          |         |        |
| <b>Main</b>         |           | 0.83     | 0.57     | 1.20     | 0.31    | 1.03     | 0.91     | 1.17     | 0.66    | 0.32   |
| <b>Ding</b>         |           | 1.05     | 0.85     | 1.30     | 0.64    | 1.06     | 0.94     | 1.2      | 0.350   | 0.78   |
| <b>Hirsch</b>       |           |          |          |          |         |          |          |          |         |        |
|                     | Less      | 0.99     | 0.88     | 1.12     | 0.89    | 0.96     | 0.89     | 1.04     | 0.340   | 0.50   |
|                     | More      | 0.84     | 0.75     | 0.93     | <0.001  | 1.02     | 0.93     | 1.12     | 0.710   | <0.001 |
| <b>Hypertension</b> |           |          |          |          |         |          |          |          |         |        |
| <b>Main</b>         |           | 0.86     | 0.63     | 1.18     | 0.36    | 0.98     | 0.87     | 1.10     | 0.74    | 0.65   |
| <b>Ding</b>         |           | 0.87     | 0.73     | 1.04     | 0.12    | 0.96     | 0.86     | 1.08     | 0.52    | 0.46   |
| <b>Hirsch</b>       |           |          |          |          |         |          |          |          |         |        |
|                     | Less      | 1.05     | 0.95     | 1.16     | 0.31    | 0.93     | 0.87     | 1        | 0.06    | 0.03   |
|                     | More      | 0.87     | 0.8      | 0.94     | <0.001  | 0.97     | 0.89     | 1.05     | 0.43    | <0.001 |
| <b>Obesity</b>      |           |          |          |          |         |          |          |          |         |        |
| <b>Main</b>         |           | 0.86     | 0.63     | 1.15     | 0.31    | 0.92     | 0.82     | 1.02     | 0.10    | 0.91   |
| <b>Ding</b>         |           | 0.85     | 0.72     | 1.01     | 0.06    | 0.98     | 0.88     | 1.09     | 0.66    | 0.29   |
| <b>Hirsch</b>       |           |          |          |          |         |          |          |          |         |        |
|                     | Less      | 0.97     | 0.88     | 1.06     | 0.48    | 0.93     | 0.87     | 1.00     | 0.05    | 0.49   |
|                     | More      | 0.88     | 0.81     | 0.95     | 0.002   | 0.92     | 0.85     | 0.99     | 0.03    | <0.001 |
| <b>Depression</b>   |           |          |          |          |         |          |          |          |         |        |

|                              |      |      |      |      |        |      |      |      |        |        |
|------------------------------|------|------|------|------|--------|------|------|------|--------|--------|
| <b>Main</b>                  |      | 0.93 | 0.66 | 1.3  | 0.66   | 1.07 | 0.94 | 1.22 | 0.28   | 0.67   |
| <b>Ding</b>                  |      | 1.05 | 0.87 | 1.27 | 0.58   | 1.12 | 0.98 | 1.27 | 0.09   | 0.85   |
| <b>Hirsch</b>                |      |      |      |      |        |      |      |      |        |        |
|                              | Less | 1.12 | 1.01 | 1.25 | 0.04   | 0.96 | 0.89 | 1.05 | 0.41   | 0.03   |
|                              | More | 1.08 | 0.99 | 1.18 | 0.09   | 1.08 | 0.98 | 1.19 | 0.14   | 0.97   |
| <b>Asthma</b>                |      |      |      |      |        |      |      |      |        |        |
| <b>Main</b>                  |      | 1.25 | 0.81 | 1.92 | 0.31   | 1.01 | 0.88 | 1.17 | 0.85   | 0.25   |
| <b>Ding</b>                  |      | 1.17 | 0.92 | 1.49 | 0.19   | 1.12 | 0.97 | 1.29 | 0.12   | 0.71   |
| <b>Hirsch</b>                |      |      |      |      |        |      |      |      |        |        |
|                              | Less | 0.95 | 0.82 | 1.09 | 0.48   | 1.03 | 0.94 | 1.13 | 0.57   | 0.35   |
|                              | More | 0.92 | 0.82 | 1.04 | 0.20   | 1.01 | 0.9  | 1.13 | 0.86   | 0.39   |
| <b>Emergency Department</b>  |      |      |      |      |        |      |      |      |        |        |
| <b>Main</b>                  |      | 0.94 | 0.72 | 1.23 | 0.66   | 1.15 | 1.05 | 1.26 | 0.003  | 0.48   |
| <b>Ding</b>                  |      | 1.05 | 0.90 | 1.23 | 0.53   | 1.12 | 1.02 | 1.22 | 0.01   | 0.42   |
| <b>Hirsch</b>                |      |      |      |      |        |      |      |      |        |        |
|                              | Less | 1.22 | 1.11 | 1.33 | <0.001 | 0.96 | 0.91 | 1.02 | 0.22   | <0.001 |
|                              | More | 1.08 | 1.00 | 1.16 | 0.05   | 1.16 | 1.09 | 1.24 | <0.001 | 0.002  |
| <b>Inpatient Department</b>  |      |      |      |      |        |      |      |      |        |        |
| <b>Main</b>                  |      | 1.00 | 0.68 | 1.47 | 0.99   | 1.11 | 0.98 | 1.27 | 1.00   | 0.76   |
| <b>Ding</b>                  |      | 1.08 | 0.86 | 1.36 | 0.49   | 1.08 | 0.95 | 1.23 | 0.25   | 0.84   |
| <b>Hirsch</b>                |      |      |      |      |        |      |      |      |        |        |
|                              | Less | 1.15 | 1.01 | 1.31 | 0.03   | 1.01 | 0.92 | 1.10 | 0.88   | 0.08   |
|                              | More | 1.00 | 0.9  | 1.11 | 1.00   | 1.08 | 0.98 | 1.19 | 0.11   | 0.03   |
| <b>Outpatient Department</b> |      |      |      |      |        |      |      |      |        |        |
| <b>Main</b>                  |      | 0.9  | 0.67 | 1.19 | 0.45   | 0.94 | 0.87 | 1    | 0.05   | 0.94   |
| <b>Ding</b>                  |      | 1.03 | 0.92 | 1.16 | 0.60   | 0.96 | 0.89 | 1.03 | 0.26   | 0.17   |
